# Supplementary material for: GATA2 regulates mast cell identity and responsiveness to antigenic stimulation by promoting chromatin remodeling at super-enhancers
Source: PubMed Central journal article supplement (PMC7820599; doi:10.1038/s41467-020-20766-0), 2021-01-21
Supplement: 41467_2020_20766_MOESM3_ESM.pdf [file 41467_2020_20766_MOESM3_ESM.pdf]

## Description of Additional Supplementary Files

**Supplementary Data 1.** Potential enhancers identified by H3K4me1 and H3K27ac ChIP-seq in resting mast cells, related to Fig. 1.

**Supplementary Data 2.** Super-enhancers and typical enhancers generated from two biological replicates, related to Fig. 1.

**Supplementary Data 3.** The ID genes, key ID genes, and non-ID genes in mast cells, related to Fig. 1.

**Supplementary Data 4.** Expression of the shared ID genes, related to Fig. 1.

**Supplementary Data 5.** The accessible regions located outside of the regions with H3K27ac modification in resting mast cells and with increase H3K27ac modification in activated mast cells, related to Fig. 2 and Fig. 7.

**Supplemental Data 6.** FPKM reads of the ID genes and the key cytokine and chemokine genes in BMMCs derived from bone marrow cells of B6 or BALB/c genetic background mice, related to Supplementary Fig. 4.

**Supplementary Data 7.** H3K4me1, H3K27ac ChIP-seq and ATAC-seq reads at the super-enhancers of key ID genes and RNA expression of key ID genes in WT and *Gata2* KO BMMCs, related to Fig. 3.

**Supplementary Data 8.** mRNA expression of the genes that have already been identified as self-renewal genes in *Gata2* WT or KO BMMCs, related to Fig. 3.

**Supplementary Data 9.** The complete list of RNA-seq genes and GO analysis of the induced and repressed genes in BMMCs, Related to Fig. 4. P-values were calculated by a one-side Fisher's exact test with the adjustment of Benjamini-Hochberg method.

**Supplementary Data 10.** Key activation-induced genes and non-key activation induced genes, related to Fig. 5.

**Supplementary Data 11.** H3K4me1, H3K27ac ChIP-seq and ATAC-seq reads at the typical enhancers of non-key cytokine and chemokine genes and super-enhancers of key cytokine and chemokine genes, related to Fig. 6.

**Supplementary Data 12.** Expression of the genes which are encoding molecules important for IgE receptor crosslinking signaling pathway in resting WT and *Gata2* KO BMMCs, related to Fig. 7.

**Supplementary Data 13.** Reads per enhancer for the typical and super-enhancers and RNA transcripts in resting and activated WT or *Gata2* KO BMMCs, related to Fig. 7.
