# Supplementary material for: GATA2 regulates mast cell identity and responsiveness to antigenic stimulation by promoting chromatin remodeling at super-enhancers
Source: PubMed Central journal article supplement (PMC7820599; doi:10.1038/s41467-020-20766-0), 2021-01-21
Supplement: 41467_2020_20766_MOESM17_ESM.pdf [file 41467_2020_20766_MOESM17_ESM.pdf]

## Reporting Summary

Nature Research wishes to improve the reproducibility of the work that we publish. This form provides structure for consistency and transparency in reporting. For further information on Nature Research policies, see [Authors & Referees](#) and the [Editorial Policy Checklist](#).

### Statistics

For all statistical analyses, confirm that the following items are present in the figure legend, table legend, main text, or Methods section.

n/a Confirmed

- |                                     |                                     |                                                                                                                                                                                                                                                            |
|-------------------------------------|-------------------------------------|------------------------------------------------------------------------------------------------------------------------------------------------------------------------------------------------------------------------------------------------------------|
| <input type="checkbox"/>            | <input checked="" type="checkbox"/> | The exact sample size ( $n$ ) for each experimental group/condition, given as a discrete number and unit of measurement                                                                                                                                    |
| <input type="checkbox"/>            | <input checked="" type="checkbox"/> | A statement on whether measurements were taken from distinct samples or whether the same sample was measured repeatedly                                                                                                                                    |
| <input type="checkbox"/>            | <input checked="" type="checkbox"/> | The statistical test(s) used AND whether they are one- or two-sided<br><i>Only common tests should be described solely by name; describe more complex techniques in the Methods section.</i>                                                               |
| <input checked="" type="checkbox"/> | <input type="checkbox"/>            | A description of all covariates tested                                                                                                                                                                                                                     |
| <input checked="" type="checkbox"/> | <input type="checkbox"/>            | A description of any assumptions or corrections, such as tests of normality and adjustment for multiple comparisons                                                                                                                                        |
| <input type="checkbox"/>            | <input checked="" type="checkbox"/> | A full description of the statistical parameters including central tendency (e.g. means) or other basic estimates (e.g. regression coefficient) AND variation (e.g. standard deviation) or associated estimates of uncertainty (e.g. confidence intervals) |
| <input type="checkbox"/>            | <input checked="" type="checkbox"/> | For null hypothesis testing, the test statistic (e.g. $F$ , $t$ , $r$ ) with confidence intervals, effect sizes, degrees of freedom and $P$ value noted<br><i>Give <math>P</math> values as exact values whenever suitable.</i>                            |
| <input checked="" type="checkbox"/> | <input type="checkbox"/>            | For Bayesian analysis, information on the choice of priors and Markov chain Monte Carlo settings                                                                                                                                                           |
| <input checked="" type="checkbox"/> | <input type="checkbox"/>            | For hierarchical and complex designs, identification of the appropriate level for tests and full reporting of outcomes                                                                                                                                     |
| <input type="checkbox"/>            | <input checked="" type="checkbox"/> | Estimates of effect sizes (e.g. Cohen's $d$ , Pearson's $r$ ), indicating how they were calculated                                                                                                                                                         |

*Our web collection on [statistics for biologists](#) contains articles on many of the points above.*

### Software and code

Policy information about [availability of computer code](#)

Data collection Summit (version 4.3); all sequencings were performed on an Illumina NovaSEQ6000 platform with a Paired End 150 cycle 2x150 mode.

Data analysis Trimmomatic (version 0.33); FastQC (version 0.11.9); Bowtie2 (version 2.3.5.1); MACS2 (version 2.1.2); Integrative Genomics Viewer (IGV, version 2.8.0); STAR (version 2.4.0.1); Cufflinks (version 2.2.1); Cuffmerge (version 1.0.0); Cuffdiff (version 2.2.1); Expander software (version 7.2); DAVID (version 6.8); SAMtools (version 1.7); ROSE software (version 1); ChIPseeker (version 1.18.0); GREAT (version 4.0.4); BETA (Version 1.0.7); Bedtools (version 2.29.2); Diffbind (version 2.10.0); MEME-ChIP (version 5.2.0); ggpubr (version 0.2); deepTools (version 3.3.0); FlowJo (version 8.2).

For manuscripts utilizing custom algorithms or software that are central to the research but not yet described in published literature, software must be made available to editors/reviewers. We strongly encourage code deposition in a community repository (e.g. GitHub). See the Nature Research [guidelines for submitting code & software](#) for further information.

### Data

Policy information about [availability of data](#)

All manuscripts must include a [data availability statement](#). This statement should provide the following information, where applicable:

- Accession codes, unique identifiers, or web links for publicly available datasets
- A list of figures that have associated raw data
- A description of any restrictions on data availability

The sequencing data has been uploaded to the GEO database. And following is the detailed information about the deposited data:

Raw and analyzed data: GSE145612;  
 ATAC-seq data: GSE145542;  
 ChIP-seq data: GSE145544;  
 RNA-seq data: GSE145611.

## Field-specific reporting

Please select the one below that is the best fit for your research. If you are not sure, read the appropriate sections before making your selection.

Life sciences  Behavioural & social sciences  Ecological, evolutionary & environmental sciences

For a reference copy of the document with all sections, see [nature.com/documents/nr-reporting-summary-flat.pdf](https://www.nature.com/documents/nr-reporting-summary-flat.pdf)

## Life sciences study design

All studies must disclose on these points even when the disclosure is negative.

|                 |                                                                                                                                                                                                                                                                                                                                                                                                                                                                                       |
|-----------------|---------------------------------------------------------------------------------------------------------------------------------------------------------------------------------------------------------------------------------------------------------------------------------------------------------------------------------------------------------------------------------------------------------------------------------------------------------------------------------------|
| Sample size     | Tow biological samples were used for ChIP-seq analyses according to the published paper: "Initial RNA polymerase II ChIP-seq experiments showed that more than two replicates did not significantly improve site discovery (Rozowsky et al. 2009)." Two or three biological samples were used for RNA-seq analyses and two biological samples were used for Omni-ATAC-seq analyses according to the previous publications which show two or three replicates are enough for analyses. |
| Data exclusions | No data were excluded from the analyses.                                                                                                                                                                                                                                                                                                                                                                                                                                              |
| Replication     | Two or three biological replicates were used for data analyses. The reproducibility of the sequencing data was shown in supplementary figure 1 and 2.                                                                                                                                                                                                                                                                                                                                 |
| Randomization   | BMMCs derived from mice were allocated randomly into treatment groups.                                                                                                                                                                                                                                                                                                                                                                                                                |
| Blinding        | Sequencing was carried out in a blinded manner. Investigators were not blinded data analysis since we need to combine the data from same treatment for the downstream analysis.                                                                                                                                                                                                                                                                                                       |

## Reporting for specific materials, systems and methods

We require information from authors about some types of materials, experimental systems and methods used in many studies. Here, indicate whether each material, system or method listed is relevant to your study. If you are not sure if a list item applies to your research, read the appropriate section before selecting a response.

| Materials & experimental systems    |                                                                 | Methods                             |                                                    |
|-------------------------------------|-----------------------------------------------------------------|-------------------------------------|----------------------------------------------------|
| n/a                                 | Involved in the study                                           | n/a                                 | Involved in the study                              |
| <input type="checkbox"/>            | <input checked="" type="checkbox"/> Antibodies                  | <input type="checkbox"/>            | <input checked="" type="checkbox"/> ChIP-seq       |
| <input checked="" type="checkbox"/> | <input type="checkbox"/> Eukaryotic cell lines                  | <input type="checkbox"/>            | <input checked="" type="checkbox"/> Flow cytometry |
| <input checked="" type="checkbox"/> | <input type="checkbox"/> Palaeontology                          | <input checked="" type="checkbox"/> | <input type="checkbox"/> MRI-based neuroimaging    |
| <input type="checkbox"/>            | <input checked="" type="checkbox"/> Animals and other organisms |                                     |                                                    |
| <input checked="" type="checkbox"/> | <input type="checkbox"/> Human research participants            |                                     |                                                    |
| <input checked="" type="checkbox"/> | <input type="checkbox"/> Clinical data                          |                                     |                                                    |

## Antibodies

|                 |                                                                                                                                                                                                                                                                                                                                                                                                                                                                                                                                                                                                                                                                                                                                                                                                                                                                                                                                                                                                                                                                                                                                                                                        |
|-----------------|----------------------------------------------------------------------------------------------------------------------------------------------------------------------------------------------------------------------------------------------------------------------------------------------------------------------------------------------------------------------------------------------------------------------------------------------------------------------------------------------------------------------------------------------------------------------------------------------------------------------------------------------------------------------------------------------------------------------------------------------------------------------------------------------------------------------------------------------------------------------------------------------------------------------------------------------------------------------------------------------------------------------------------------------------------------------------------------------------------------------------------------------------------------------------------------|
| Antibodies used | Anti-Histone H3 (mono methyl K4) antibody-ChIP Grade (ab8895, Abcam); Anti-Histone H3 (acetyl K27) antibody - ChIP Grade (ab4729, Abcam); allophycocyanin-CY7-conjugated anti-c-Kit (2B8) (105825, Biolegend); PE-CY7-conjugated anti-FcεRIa (MAR-1) (134317, Biolegend); IgE anti-2, 4, 6-Trinitrophenyl (TNP) antibody.<br>CCL1, CCL2, CCL3, CCL4, CCL7, TNFalpha and IL-6 protein levels were detected by the ELISA kit purchased from LifeSpan BioSciences, Seattle, WA, and following are the detailed information:<br>CCL1 ELISA kit (LS-F290-1); CCL2 ELISA kit (LS-F31326-1); CCL3 ELISA kit(LS-F31325-1); CCL4 ELISA kit (LS-F31354-1); CCL7 ELISA kit (LS-F619-1); TNF alpha ELISA kit (LS-F31434-1); IL-6 ELISA kit (LS-F57505-1).                                                                                                                                                                                                                                                                                                                                                                                                                                          |
| Validation      | IgE anti-TNP antibody was purified from hybridoma IGEL a2 [15.3] (ATCC® TIB-142™), which was validated by our previous publication: J Allergy Clin Immunol. 2018 Oct;142(4):1173-1184.<br>All the other antibodies were validated by the manufacturers, which can be found on the following websites:<br>Anti-Histone H3 (mono methyl K4) antibody-ChIP Grade: <a href="https://www.abcam.com/histone-h3-mono-methyl-k4-antibody-chip-grade-ab8895.html">https://www.abcam.com/histone-h3-mono-methyl-k4-antibody-chip-grade-ab8895.html</a> ;<br>Anti-Histone H3 (acetyl K27) antibody - ChIP Grade: <a href="https://www.abcam.com/histone-h3-acetyl-k27-antibody-chip-grade-ab4729.html">https://www.abcam.com/histone-h3-acetyl-k27-antibody-chip-grade-ab4729.html</a> ;<br>Anti-GATA2 antibody - ChIP Grade (ab22849): <a href="https://www.abcam.com/gata2-antibody-chip-grade-ab22849.html">https://www.abcam.com/gata2-antibody-chip-grade-ab22849.html</a> ;<br>allophycocyanin-CY7-conjugated anti-c-Kit (2B8): <a href="https://www.biolegend.com/en-us/products/apccyanine7-anti-mouse-cd117-">https://www.biolegend.com/en-us/products/apccyanine7-anti-mouse-cd117-</a> |

c-kit-antibody-5905;  
 PE-CY7-conjugated anti-FcεR1a (MAR-1): <https://www.biolegend.com/en-us/products/pe-cy7-anti-mouse-fcepsilonrialfalpha-antibody-6861>; 1  
 Mouse CCL1 ELISA Kit (LS-F290-1): <https://www.lsbio.com/elisakits/mouse-i-309-ccl1-sandwich-elisa-elisa-kit-ls-f290/290>;  
 Mouse CCL2 ELISA Kit (LS-F31326-1): <https://www.lsbio.com/antibodypairs-elisadevelopmentkits/devkit-core-mouse-ccl2-mcp1-elisa-development-kit-ls-f31326/31326>;  
 Mouse CCL3 ELISA Kit (LS-F31325-1): <https://www.lsbio.com/antibodypairs-elisadevelopmentkits/devkit-core-mouse-ccl3-mip-1-alpha-elisa-development-kit-ls-f31325/31325>;  
 Mouse CCL4 ELISA Kit (LS-F31354-1): <https://www.lsbio.com/antibodypairs-elisadevelopmentkits/devkit-core-mouse-ccl4-mip-1-beta-elisa-development-kit-ls-f31354/31354?trid=247>;  
 Mouse CCL7 ELISA Kit (LS-F619-1): <https://www.lsbio.com/elisakits/mouse-ccl7-mcp3-sandwich-elisa-elisa-kit-ls-f619/619>;  
 Mouse TNF alpha ELISA Kit (LS-F31434-1): <https://www.lsbio.com/antibodypairs-elisadevelopmentkits/devkit-core-mouse-tnf-alpha-elisa-development-kit-ls-f31434/31434>;  
 Mouse IL-6 ELISA Kit (LS-F57505-1): <https://www.lsbio.com/antibodypairs-elisadevelopmentkits/devkit-core-mouse-il6-interleukin-6-elisa-development-kit-ls-f57505/57505>.

## Animals and other organisms

Policy information about [studies involving animals](#); [ARRIVE guidelines](#) recommended for reporting animal research

### Laboratory animals

Balb/cj (000651, the Jackson Laboratory, Bar Harbor, ME) were purchased from the Jackson Laboratory. Inducible Gata2 knockout Gata2f/fRosaYfp/YfpTgCreErt2hemi mice or wild-type control Gata2+/+RosaYfp/YfpTgCreErt2hemi mice on 129 genetic background backcrossed to C57BL/6 genetic background for 5 generation were bred by us. The mice were generated by crossing Gata2f/f mice to Cre activity reporter RosaYfp/Yfp mice and inducible Cre mice as described before (J Allergy Clin Immunol. 2018 Oct;142(4):1173-1184). Six-week old male or female mice were used for experiments. Housing conditions: 72 to 74 °F ambient temperature, 50-60% humidity and 12 hours dark/light cycle.

### Wild animals

The study did not involve wild animals.

### Field-collected samples

The study did not involve samples collected from field.

### Ethics oversight

All animal experiments were conducted according to protocols approved by the National Jewish Health Institutional Animal Care and Use Committee (Protocol number: AS2703-02-23).

Note that full information on the approval of the study protocol must also be provided in the manuscript.

## ChIP-seq

### Data deposition

- Confirm that both raw and final processed data have been deposited in a public database such as [GEO](#).
- Confirm that you have deposited or provided access to graph files (e.g. BED files) for the called peaks.

### Data access links

*May remain private before publication.*

<https://www.ncbi.nlm.nih.gov/geo/query/acc.cgi?acc=GSE145612>  
<https://www.ncbi.nlm.nih.gov/geo/query/acc.cgi?acc=GSE145542>  
<https://www.ncbi.nlm.nih.gov/geo/query/acc.cgi?acc=GSE145544>  
<https://www.ncbi.nlm.nih.gov/geo/query/acc.cgi?acc=GSE145611>

### Files in database submission

MC\_UN\_1\_H3K4me1\_treat\_pileup.bdg.tdf  
 MC\_UN\_2\_H3K4me1\_treat\_pileup.bdg.tdf  
 MC\_ST\_1\_H3K4me1\_treat\_pileup.bdg.tdf  
 MC\_ST\_2\_H3K4me1\_treat\_pileup.bdg.tdf  
 MC\_UN\_1\_H3K27ac\_treat\_pileup.bdg.tdf  
 MC\_UN\_2\_H3K27ac\_treat\_pileup.bdg.tdf  
 MC\_ST\_1\_H3K27ac\_treat\_pileup.bdg.tdf  
 MC\_ST\_2\_H3K27ac\_treat\_pileup.bdg.tdf  
 H3K4me1\_WT\_UN\_1\_treat\_pileup.bdg.tdf  
 H3K4me1\_WT\_UN\_2\_treat\_pileup.bdg.tdf  
 H3K4me1\_WT\_ST\_1\_treat\_pileup.bdg.tdf  
 H3K4me1\_WT\_ST\_2\_treat\_pileup.bdg.tdf  
 H3K4me1\_KO\_UN\_1\_treat\_pileup.bdg.tdf  
 H3K4me1\_KO\_UN\_2\_treat\_pileup.bdg.tdf  
 H3K4me1\_KO\_ST\_1\_treat\_pileup.bdg.tdf  
 H3K4me1\_KO\_ST\_2\_treat\_pileup.bdg.tdf  
 H3K27Ac\_WT\_UN\_1\_treat\_pileup.bdg.tdf  
 H3K27Ac\_WT\_UN\_2\_treat\_pileup.bdg.tdf  
 H3K27Ac\_WT\_ST\_1\_treat\_pileup.bdg.tdf  
 H3K27Ac\_WT\_ST\_2\_treat\_pileup.bdg.tdf

H3K27Ac\_KO\_UN\_1\_treat\_pileup.bdg.tdf  
H3K27Ac\_KO\_UN\_2\_treat\_pileup.bdg.tdf  
H3K27Ac\_KO\_ST\_1\_treat\_pileup.bdg.tdf  
H3K27Ac\_KO\_ST\_2\_treat\_pileup.bdg.tdf  
MC\_UN\_1\_H3K4me1\_treat\_pileup.bdg  
MC\_UN\_2\_H3K4me1\_treat\_pileup.bdg  
MC\_ST\_1\_H3K4me1\_treat\_pileup.bdg  
MC\_ST\_2\_H3K4me1\_treat\_pileup.bdg  
MC\_UN\_1\_H3K27ac\_treat\_pileup.bdg  
MC\_UN\_2\_H3K27ac\_treat\_pileup.bdg  
MC\_ST\_1\_H3K27ac\_treat\_pileup.bdg  
MC\_ST\_2\_H3K27ac\_treat\_pileup.bdg  
H3K4me1\_WT\_UN\_1\_treat\_pileup.bdg  
H3K4me1\_WT\_UN\_2\_treat\_pileup.bdg  
H3K4me1\_WT\_ST\_1\_treat\_pileup.bdg  
H3K4me1\_WT\_ST\_2\_treat\_pileup.bdg  
H3K4me1\_KO\_UN\_1\_treat\_pileup.bdg  
H3K4me1\_KO\_UN\_2\_treat\_pileup.bdg  
H3K4me1\_KO\_ST\_1\_treat\_pileup.bdg  
H3K4me1\_KO\_ST\_2\_treat\_pileup.bdg  
H3K27Ac\_WT\_UN\_1\_treat\_pileup.bdg  
H3K27Ac\_WT\_UN\_2\_treat\_pileup.bdg  
H3K27Ac\_WT\_ST\_1\_treat\_pileup.bdg  
H3K27Ac\_WT\_ST\_2\_treat\_pileup.bdg  
H3K27Ac\_KO\_UN\_1\_treat\_pileup.bdg  
H3K27Ac\_KO\_UN\_2\_treat\_pileup.bdg  
H3K27Ac\_KO\_ST\_1\_treat\_pileup.bdg  
H3K27Ac\_KO\_ST\_2\_treat\_pileup.bdg  
GATA2\_UN\_1\_treat\_pileup.bdg.tdf  
GATA2\_UN\_2\_treat\_pileup.bdg.tdf  
GATA2\_ST\_1\_treat\_pileup.bdg.tdf  
GATA2\_ST\_2\_treat\_pileup.bdg.tdf  
GATA2\_UN\_1\_treat\_pileup.bdg  
GATA2\_UN\_2\_treat\_pileup.bdg  
GATA2\_ST\_1\_treat\_pileup.bdg  
GATA2\_ST\_2\_treat\_pileup.bdg  
Gata2\_WT\_UN\_1\_ATAC\_treat\_pileup.bdg.tdf  
Gata2\_WT\_UN\_1\_ATAC\_treat\_pileup.bdg  
Gata2\_WT\_UN\_2\_ATAC\_treat\_pileup.bdg.tdf  
Gata2\_WT\_UN\_2\_ATAC\_treat\_pileup.bdg  
Gata2\_WT\_ST\_1\_ATAC\_treat\_pileup.bdg.tdf  
Gata2\_WT\_ST\_1\_ATAC\_treat\_pileup.bdg  
Gata2\_WT\_ST\_2\_ATAC\_treat\_pileup.bdg.tdf  
Gata2\_WT\_ST\_2\_ATAC\_treat\_pileup.bdg  
Gata2\_KO\_UN\_1\_ATAC\_treat\_pileup.bdg.tdf  
Gata2\_KO\_UN\_1\_ATAC\_treat\_pileup.bdg  
Gata2\_KO\_UN\_2\_ATAC\_treat\_pileup.bdg.tdf  
Gata2\_KO\_UN\_2\_ATAC\_treat\_pileup.bdg  
Gata2\_KO\_ST\_1\_ATAC\_treat\_pileup.bdg.tdf  
Gata2\_KO\_ST\_1\_ATAC\_treat\_pileup.bdg  
Gata2\_KO\_ST\_2\_ATAC\_treat\_pileup.bdg.tdf  
Gata2\_KO\_ST\_2\_ATAC\_treat\_pileup.bdg  
MC\_UNvsST\_gene\_exp.diff  
Gata2\_KO\_UNvsST\_gene\_exp.diff  
Gata2\_WTvsKO\_UN\_gene\_exp.diff  
Gata2\_WT\_UNvsST\_gene\_exp.diff  
MC\_UN\_1.fpk\_tracking  
MC\_UN\_2.fpk\_tracking  
MC\_UN\_3.fpk\_tracking  
MC\_ST\_1.fpk\_tracking  
MC\_ST\_2.fpk\_tracking  
MC\_ST\_3.fpk\_tracking  
PU1.fpk\_tracking  
PU2.fpk\_tracking  
PS1.fpk\_tracking  
PS2.fpk\_tracking  
FU1.fpk\_tracking  
FU2.fpk\_tracking

|                                                     |                                                                                                                                                                                                                                                                                                                                                                                                                                                                                                                                           |
|-----------------------------------------------------|-------------------------------------------------------------------------------------------------------------------------------------------------------------------------------------------------------------------------------------------------------------------------------------------------------------------------------------------------------------------------------------------------------------------------------------------------------------------------------------------------------------------------------------------|
| Genome browser session (e.g. <a href="#">UCSC</a> ) | FS1.fpkm_tracking<br>FS2.fpkm_tracking<br><br>https://genome.ucsc.edu/s/Yapeng%20Li/Gata2%20WT%20KO%20UN%20ST%20ChIP%2Dseq%20ATAC%2Dseq                                                                                                                                                                                                                                                                                                                                                                                                   |
| <b>Methodology</b>                                  |                                                                                                                                                                                                                                                                                                                                                                                                                                                                                                                                           |
| Replicates                                          | Two biological replicates were used for each ChIP-seq experiment.                                                                                                                                                                                                                                                                                                                                                                                                                                                                         |
| Sequencing depth                                    | All sequencings were performed on an Illumina NovaSEQ6000 platform with a Paired End 150 cycle 2x150 mode.                                                                                                                                                                                                                                                                                                                                                                                                                                |
| Antibodies                                          | Anti-Histone H3 (mono methyl K4) antibody-ChIP Grade: Abcam, ab8895;<br>Anti-Histone H3 (acetyl K27) antibody - ChIP Grade: Abcam, ab4729.<br>anti-GATA2 antibody -ChIP Grade: (ab22849, Abcam)                                                                                                                                                                                                                                                                                                                                           |
| Peak calling parameters                             | The adaptor sequences in raw reads (average 24.0 million reads, two biological replicates for each group) were trimmed using Trimmomatic (version 0.33) (Bolger et al., 2014) and the quality of trimmed sequence data was analyzed by FastQC (version 0.11.9). The trimmed reads were aligned to the mm10 reference genome (GRCm38) using Bowtie2 (version 2.3.5.1) (Langmead and Salzberg, 2012). Peak calling was performed using MACS2 (version 2.1.2) with default parameters with the q-value cut-off of 0.05 (Zhang et al., 2008). |
| Data quality                                        | Peak calling was performed using MACS2 (version 2.1.2) with default parameters with the q-value cut-off of 0.05 (Zhang et al., 2008).                                                                                                                                                                                                                                                                                                                                                                                                     |
| Software                                            | The software used for sequencing alignment and peak calling is described in Methods section ("ChIP-seq data analysis")                                                                                                                                                                                                                                                                                                                                                                                                                    |

## Flow Cytometry

### Plots

Confirm that:

- The axis labels state the marker and fluorochrome used (e.g. CD4-FITC).
- The axis scales are clearly visible. Include numbers along axes only for bottom left plot of group (a 'group' is an analysis of identical markers).
- All plots are contour plots with outliers or pseudocolor plots.
- A numerical value for number of cells or percentage (with statistics) is provided.

### Methodology

|                           |                                                                                                                                                                                                                                  |
|---------------------------|----------------------------------------------------------------------------------------------------------------------------------------------------------------------------------------------------------------------------------|
| Sample preparation        | BMMCs were cultured from bone marrow cells of mice in the presence of 20 ng/mL IL-3 as described in Methods section.                                                                                                             |
| Instrument                | CyAN (DakoCytomation, Glostrup, Denmark).                                                                                                                                                                                        |
| Software                  | Data collection: Summit (version 4.3);<br>Data analysis: FlowJo (version 8.2).                                                                                                                                                   |
| Cell population abundance | The purity of sorted cells was higher than 99%, which was verified by the flow cytometry analysis using the FACS sorter.                                                                                                         |
| Gating strategy           | BMMCs were gated using the following strategy: 1. FSLin and SSLin; 2. Live cells based on DAPI negative; 3. YFP positive cells showing the 4-OHT treatment induced Gata2 deleted or control cells; 4. FceR1a and c-Kit positive. |

- Tick this box to confirm that a figure exemplifying the gating strategy is provided in the Supplementary Information.
